# Supplementary material for: Upper extremity function and disability recovery with vibration therapy after stroke: a systematic review and meta-analysis of RCTs
Source: PubMed Central journal article supplement (PMC11662454; doi:10.1186/s12984-024-01515-6), 2024-12-21

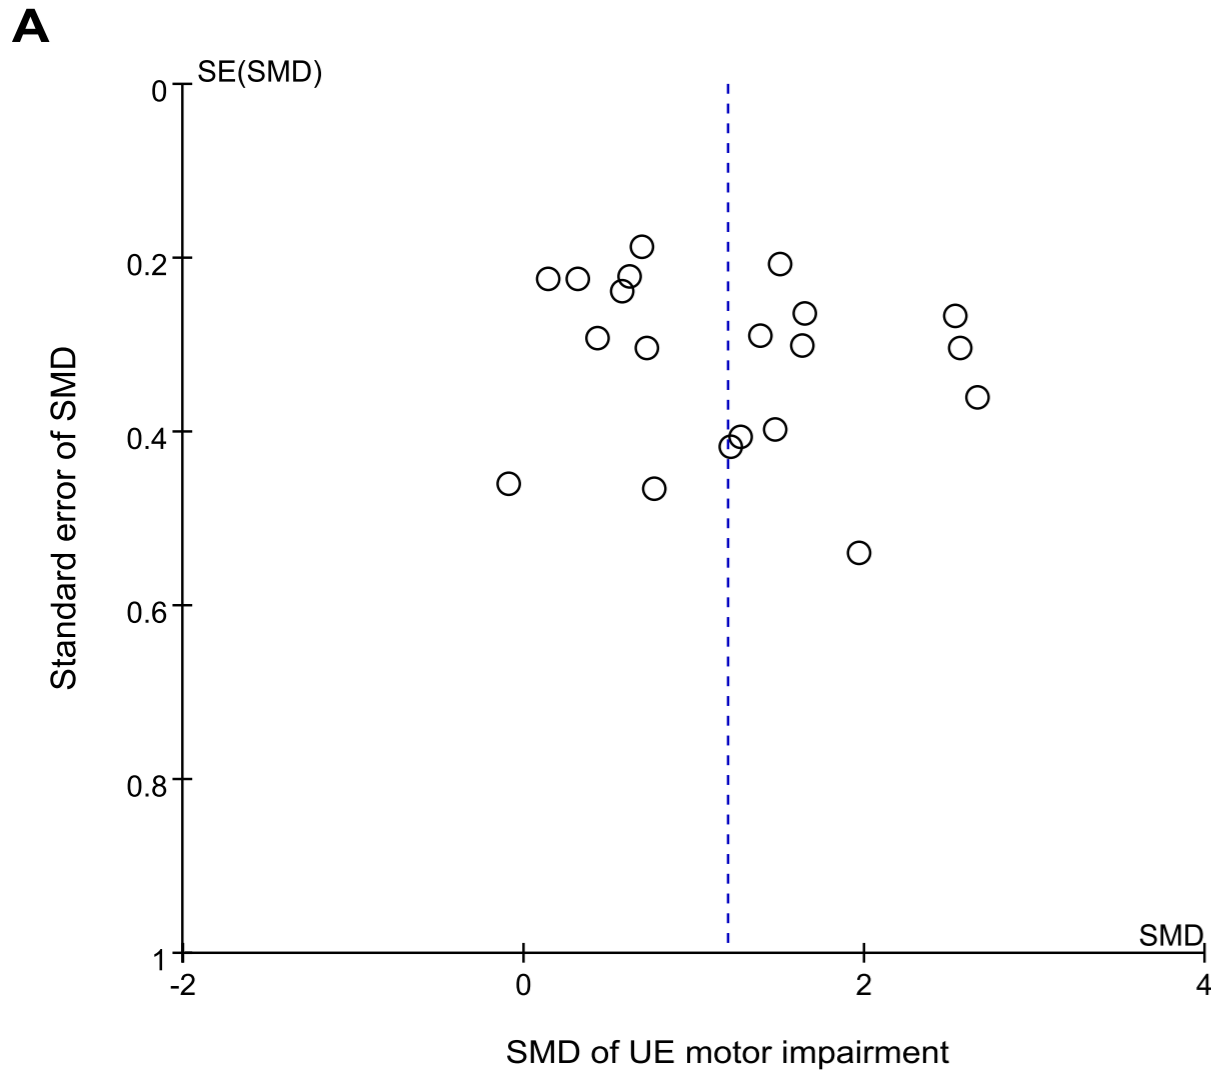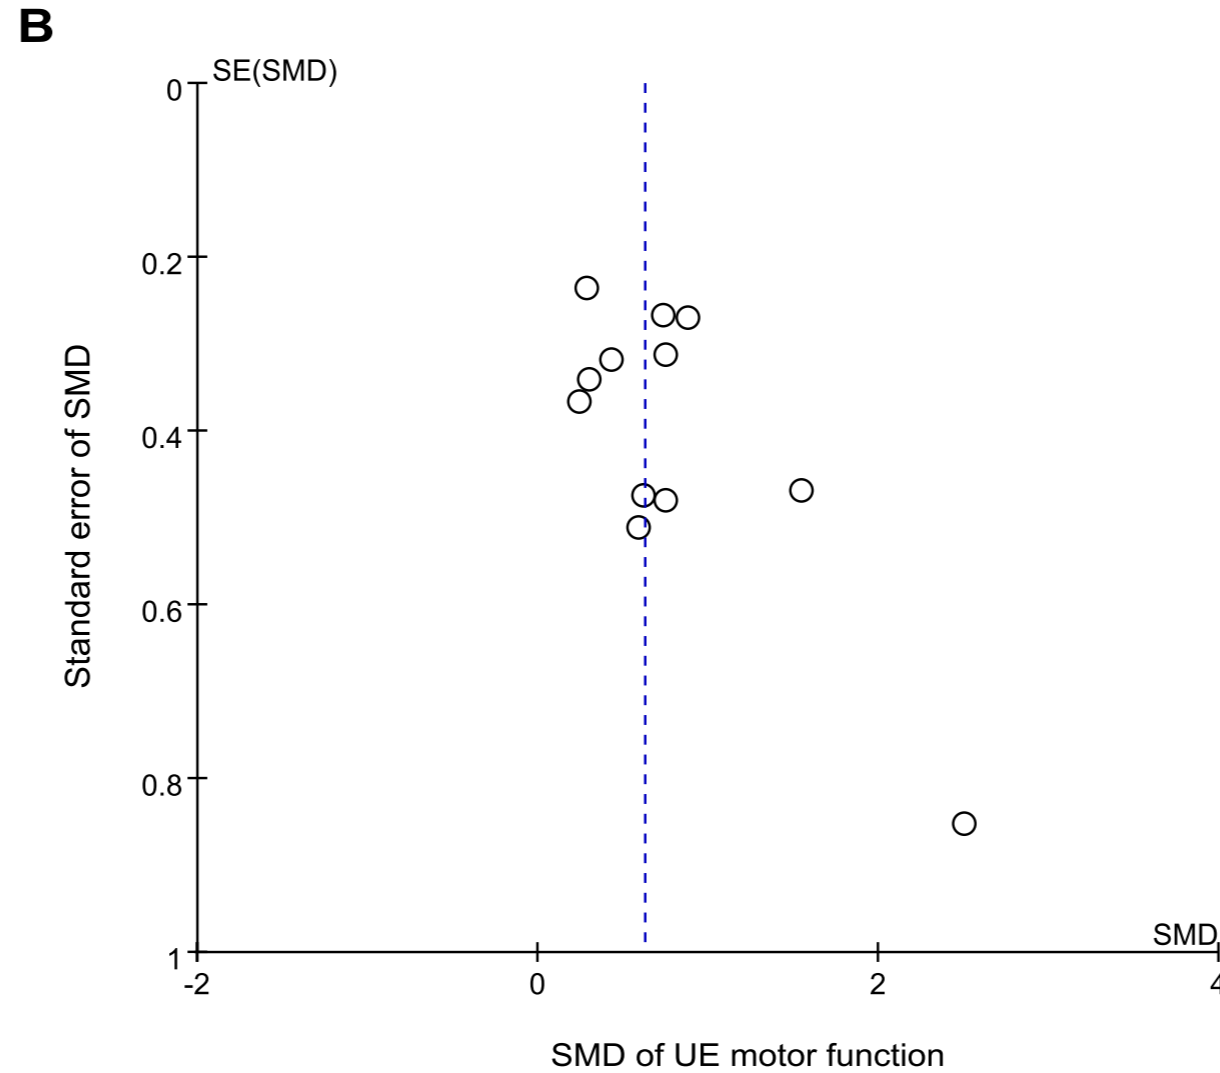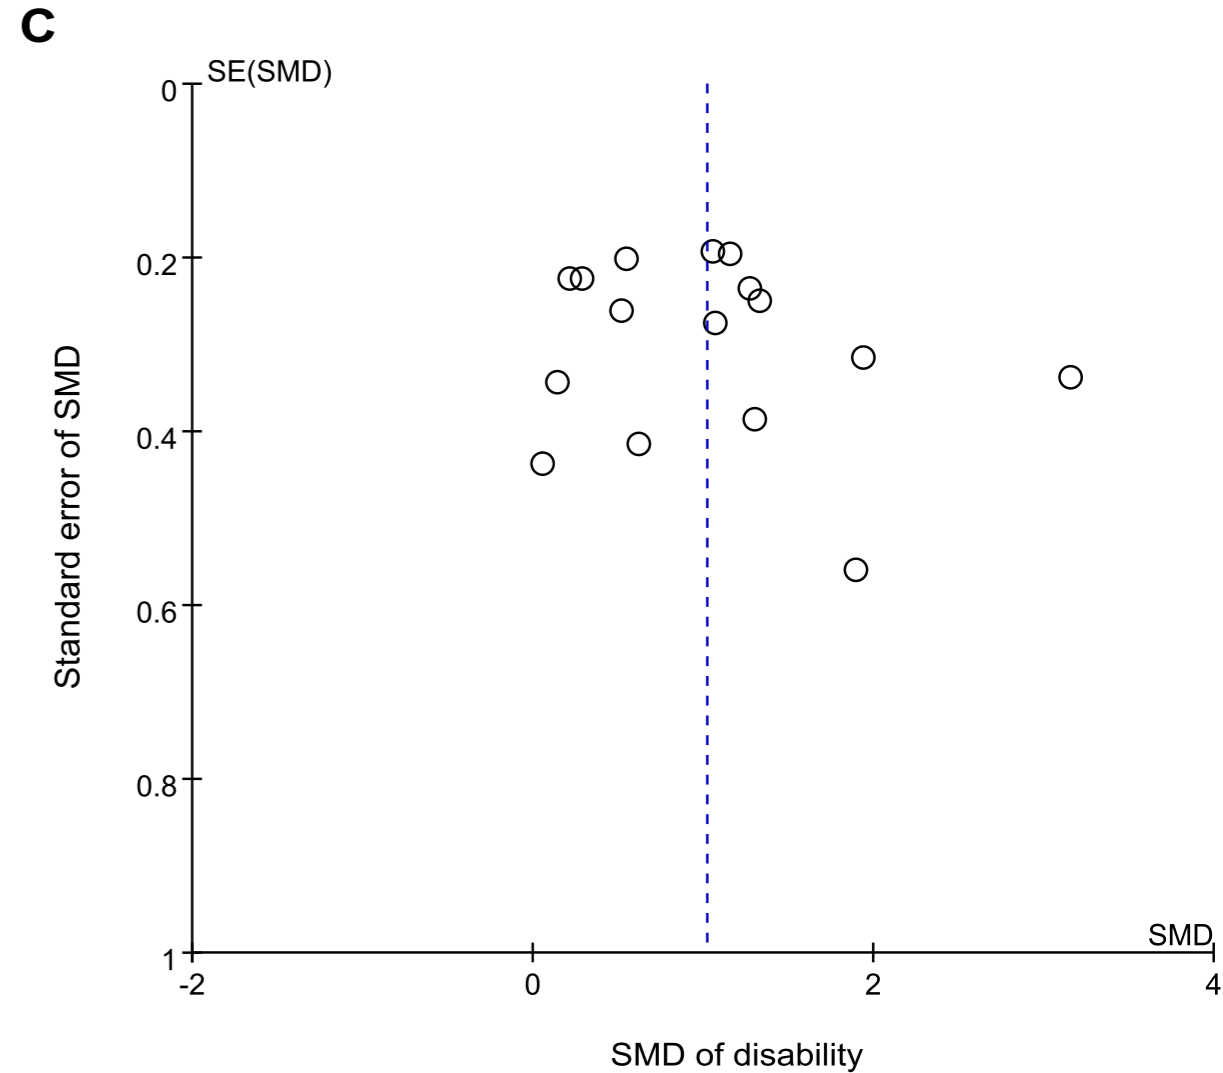

Supplement: 12984_2024_1515_MOESM1_ESM.pdf [file 12984_2024_1515_MOESM1_ESM.pdf]
