# Supplementary material for: Upper extremity function and disability recovery with vibration therapy after stroke: a systematic review and meta-analysis of RCTs
Source: PubMed Central journal article supplement (PMC11662454; doi:10.1186/s12984-024-01515-6), 2024-12-21
Supplement: 12984_2024_1515_MOESM2_ESM.pdf [file 12984_2024_1515_MOESM2_ESM.pdf]

## Supplementary Table 1

### Database search formulas

| Data base                                           | Search terms for query                                                                                           |
|-----------------------------------------------------|------------------------------------------------------------------------------------------------------------------|
| <b>Pubmed</b>                                       |                                                                                                                  |
| #1                                                  | ((stroke) OR cerebral vascular accident) OR hemiplegia) OR hemiparesis                                           |
| #2                                                  | vibration                                                                                                        |
| #3                                                  | (upper extremity) OR upper limb                                                                                  |
| #4                                                  | (Randomized controlled trial) OR Randomization                                                                   |
| #5                                                  | ((#1) AND #2) AND #3) AND #4                                                                                     |
| <b>Physiotherapy Evidence Database (PEDro)</b>      |                                                                                                                  |
|                                                     | Method: clinical trial                                                                                           |
|                                                     | Abstract & Title:                                                                                                |
| #1                                                  | stroke                                                                                                           |
| #2                                                  | cerebral vascular accident                                                                                       |
| #3                                                  | vibration                                                                                                        |
| <b>Excerpta Medica dataBASE (EMBASE)</b>            |                                                                                                                  |
| #1                                                  | stroke                                                                                                           |
| #2                                                  | cerebral vascular accident                                                                                       |
| #3                                                  | #1 OR #2                                                                                                         |
| #4                                                  | vibration                                                                                                        |
| #5                                                  | #3 AND #4 AND [randomized controlled trial]/lim) AND [humans]/lim (Randomized controlled trial) OR Randomization |
| <b>Cochrane Library Database</b>                    |                                                                                                                  |
| #1                                                  | stroke                                                                                                           |
| #2                                                  | vibration                                                                                                        |
| #3                                                  | randomized controlled trial                                                                                      |
| #4                                                  | #1 AND #2 AND #3                                                                                                 |
| <b>China knowledge resource integrated database</b> |                                                                                                                  |
| #1                                                  | stroke                                                                                                           |
| #2                                                  | vibration                                                                                                        |
| #3                                                  | randomized controlled trial                                                                                      |
| #4                                                  | #1 AND #2 AND #3                                                                                                 |

(continued)

**Table S1. (continued)**

---

| <b>Data base</b>      | <b>Search terms for query</b>           |
|-----------------------|-----------------------------------------|
| <b>Google Scholar</b> |                                         |
| #1                    | allintitle: stroke                      |
| #2                    | allintitle: vibration                   |
| #3                    | allintitle: randomized controlled trial |

---
