# Supplementary material for: Upper extremity function and disability recovery with vibration therapy after stroke: a systematic review and meta-analysis of RCTs
Source: PubMed Central journal article supplement (PMC11662454; doi:10.1186/s12984-024-01515-6), 2024-12-21
Supplement: 12984_2024_1515_MOESM3_ESM.pdf [file 12984_2024_1515_MOESM3_ESM.pdf]

## Supplementary Table 2

### Type of vibration characteristics and application parameters

| Study<br>Author (year) | Vibration<br>type | Device                                                                | Manufacture<br>(country)                                | Vibration treatment protocol for experimental group |                                                                |                     |                                      |                   |                                          |                                          |                                 |                                    | Control group                  |
|------------------------|-------------------|-----------------------------------------------------------------------|---------------------------------------------------------|-----------------------------------------------------|----------------------------------------------------------------|---------------------|--------------------------------------|-------------------|------------------------------------------|------------------------------------------|---------------------------------|------------------------------------|--------------------------------|
|                        |                   |                                                                       |                                                         | Treatment<br>posture                                | Targeted muscle                                                | Time of application | Application parameters (per session) |                   |                                          | Treatment<br>frequency<br>(session/week) | Treatment<br>duration<br>(week) | Number of<br>treatment<br>sessions |                                |
|                        |                   |                                                                       |                                                         |                                                     |                                                                |                     | Rate<br>(Hz per sec)                 | Amplitude<br>(mm) | Time<br>(min/course x<br>course/session) |                                          |                                 |                                    |                                |
| Ahn<br>(2019)          | WBV               | Galileo 2000                                                          | Novotec Medical<br>GmbH (Germany)                       | Sit                                                 | Bilateral arms                                                 | Prior to SR         | 4–11                                 | NR                | 30 x 1                                   | 5                                        | 4                               | 20                                 | No vibration                   |
| Alp<br>(2016)          | WBV               | Compex<br>Winplate                                                    | Chattanooga<br>(USA)                                    | Stand                                               | Bilateral arms (with<br>hands holding on the<br>platform)      | Following SR        | 40                                   | 4                 | 5 x 1                                    | 3                                        | 4                               | 12                                 | Sham vibration<br>(no stimuli) |
| Lee<br>(2016)          | WBV               | Galileo tilting table<br>system (vertical<br>sinusoidal<br>vibration) | Novotec Medical<br>GmbH (Germany)                       | Sit                                                 | Bilateral arms (with<br>hands holding on the<br>platform)      | Following SR        | 5–15                                 | 1–6               | 30 x 1                                   | 3                                        | 4                               | 12                                 | No vibration                   |
| Li<br>(2020)           | WBV               | Galileo Med M Plus                                                    | Novotec Medical<br>GmbH (Germany)                       | Sit                                                 | Bilateral arms (with<br>hands holding on the<br>platform)      | NR                  | 5–20                                 | 4                 | 30 x 1                                   | 5                                        | 3                               | 15                                 | No vibration                   |
| Lu<br>(2017)           | WBV               | BodyGreen                                                             | BODYGREEN (Taiwan)                                      | Stand                                               | Bilateral arms (with<br>hands holding on the<br>platform)      | Following SR        | 20                                   | 4                 | 20 x 1                                   | 5                                        | 8                               | 40                                 | No vibration                   |
| Wang<br>(2018)         | WBV               | Wellengang<br>Schwingungstrainer                                      | SVG Medizinsysteme<br>GmbH & Co. KG<br>(Germany)        | Sit                                                 | Involved arm (with<br>paretic hand holding<br>on the platform) | Following SR        | 5±1                                  | 4                 | 10 x 1                                   | 6                                        | 4                               | 24                                 | No vibration                   |
| Wang<br>(2021)         | WBV               | WBV advice                                                            | Shandong Zepu<br>Medical Technology<br>Co., Ltd (China) | Stand                                               | Bilateral hands held<br>arms of the device.                    | NR                  | 3–50                                 | 6                 | 20 x 1                                   | 5                                        | 4                               | 20                                 | No vibration                   |
| Wu<br>(2022)           | WBV               | Galileo Med M Plus                                                    | Novotec Medical<br>GmbH (Germany)                       | Stand                                               | Bilateral arms (with<br>hands holding on the<br>platform)      | Following SR        | 5–20                                 | 4                 | 5 x 4                                    | 5                                        | 6                               | 30                                 | No vibration                   |
| Yang<br>(2022)         | WBV               | Wellengang                                                            | SVG<br>(Germany)                                        | Stand<br>Sit                                        | Bilateral arms (with<br>hands holding on the<br>platform)      | Following SR        | 30                                   | 4                 | 5 x 4                                    | 6                                        | 8                               | 48                                 | No vibration                   |

|                  |     |                                                                                          |                                   |        |                                                      |                                |       |                                  |              |     |      |    |                                |
|------------------|-----|------------------------------------------------------------------------------------------|-----------------------------------|--------|------------------------------------------------------|--------------------------------|-------|----------------------------------|--------------|-----|------|----|--------------------------------|
| Annino (2019)    | FMV | NR                                                                                       | NR                                | NR     | Triceps                                              | Following SR                   | 30    | 2                                | 5 x 1        | 3   | 8    | 24 | No vibration                   |
| Calabrò (2017)   | FMV | Pneumatic vibrator                                                                       | NR                                | Sit    | Triceps, supraspinatus, deltoid                      | Simultaneously applied with SR | 80    | 0.3±0.1                          | 60 x 1       | 5   | 8    | 40 | Sham vibration (80 Hz, 0.1 mm) |
| Caliandro (2012) | FMV | Electromagnetic vibrator                                                                 | NR                                | Supine |                                                      | Prior to SR                    | 100   | 0.2–0.5                          | 10 x 3       | 3   | 1    | 3  | Sham vibration (no stimuli)    |
| Casale (2014)    | FMV | VI-BRA, @Circle                                                                          |                                   | NR     | Triceps                                              | Following SR                   | 100   | 2 (2 cm <sup>2</sup> , 250 mBar) | 30 x 1       | 5   | 2    | 10 | Sham vibration (no stimuli)    |
| Celletti (2017)  | FMV | Electromagnetic vibrator                                                                 | NR                                | Supine | Pectoralis minor, biceps, flexor carpi muscle        | NR                             | 100   | 0.2–0.5                          | 10 x 3       | 3   | 1    | 3  | No vibration                   |
| Cordo (2022)     | FMV | Electromagnetic vibrator                                                                 | NR                                | Sit    | wrist, hand                                          | NR                             | 60-80 | 0.2–0.3                          | 5 x 6        | 2-3 | 6-10 | 18 | No vibration                   |
| Da-Silva (2019)  | FMV | CueS wristband (Axivity WAX9 tri-axial accelerometer)                                    | Axivity, Newcastle upon Tyne (UK) | NA     | Involved arm (wrist muscles)                         | Following SR                   | 100   | Dynamic range: ±8 g              | 12 hours/day | 7   | 4    | 28 | Sham vibration (no stimuli)    |
| Feng (2019)      | FMV | EV2610                                                                                   | Panasonic (Japan)                 | Supine | Upper arm (biceps), forearm                          | Following SR                   | 25    | NR                               | 10 x 1       | 5   | 4    | 20 | No vibration                   |
| Hsu (2021)       | FMV | Perturbation-based pinch device (horizontal vibration produced by recoil-type actuators) | NR                                | Sit    | Hand, pinch training (index finger and thumb)        | Following SR                   | 30    | 2                                | 20 x 1       | 2   | 6    | 12 | No vibration                   |
| Liu (2022)       | FMV | Wellengang                                                                               | SVG (Germany)                     | Sit    | Shoulder muscle, biceps, wrist extensor, palm muscle | Following SR                   | 6-20  | 4                                | 3 x 4        | 5   | 4    | 20 | Sham vibration                 |
| Lu (2021)        | FMV | DMS100                                                                                   | QISHENG (China)                   | Supine | Shoulder muscle, biceps, wrist extensor, palm muscle | Following SR                   | 60    | 6                                | 3–6 x 2      | 5   | 4    | 20 | No vibration                   |
| Meng (2020)      | FMV | Galileo Med M Plus                                                                       | Novotec Medical GmbH (Germany)    | Sit    | Bilateral arms (with hands holding on the platform)  | NR                             | 10    | 4                                | 20 x 1       | 3   | 4    | 12 | No vibration                   |
| Oliveira (2018)  | FMV | Digital Vibration Pad                                                                    | NissanFisio (Brazil)              | Sit    | Involved UL                                          | NA (no SR)                     | 35    | 1.5                              | 15 x 1       | 3   | 4    | 12 | No vibration                   |

|                  |     |                                           |                                                    |               |                                                      |                                |       |                              |             |   |   |    |                             |
|------------------|-----|-------------------------------------------|----------------------------------------------------|---------------|------------------------------------------------------|--------------------------------|-------|------------------------------|-------------|---|---|----|-----------------------------|
| Seo (2019)       | FMV | C-3 Tactor                                | Engineering Acoustics Inc. (USA)                   | Sit           | Wrist muscle                                         | Simultaneously applied with SR | 500   | 60% of the sensory threshold | 15 x 1      | 3 | 2 | 6  | Sham vibration (no stimuli) |
| Song (2018)      | FMV | ZEPU-K5000A                               | Shandong Zepu Medical Technology Co., Ltd (China)  | Sit or supine | Upper arm, forearm, wrist, hand                      | Following SR                   | 15–60 | 6                            | 20 x 1      | 5 | 3 | 15 | No vibration                |
| Tavernese (2013) | FMV | Horus (acoustic-wave vibratory energy)    | Akropolis (Italy)                                  | Supine        | Biceps brachii, flexor carpii ulnaris                | Following SR                   | 120   | 10                           | 30 x 1      | 5 | 2 | 10 | No vibration                |
| Toscano (2019)   | FMV | Cro®System (electromechanical transducer) | NEMOCO srl (Italy)                                 | Supine        | Biceps brachii, flexor carpii radialis               | NR                             | 100   | 0.2–0.5                      | 10 x 3      | 3 | 1 | 3  | Sham vibration (no stimuli) |
| Wei (2019)       | FMV | Sensory Cueing Wristwatch (SCW-V2)        | PolyU Technology and Consultancy Co., Ltd. (China) | NA            | Involved arm (wrist muscles)                         | Simultaneously applied with SR | 196   | NR                           | 3 hours/day | 7 | 4 | 28 | Sham vibration (no stimuli) |
| Wu (2016)        | FMV | EV2610                                    | Panasonic (Japan)                                  | Supine        | Upper arm (biceps), forearm                          | Following SR                   | 25    | NR                           | 10 x 1      | 5 | 8 | 40 | No vibration                |
| Yuan (2018)      | FMV | Deep muscle stimulator                    | DMS (Japan)                                        | NR            | Shoulder muscle, biceps, wrist extensor, palm muscle | NR                             | 60    | 6                            | 4–8 x 3     | 5 | 4 | 20 | Sham vibration (no contact) |
| Zhu (2017)       | FMV | Dynamic monitor system                    | DMS (USA)                                          | Sit or supine | Upper arm, forearm, wrist, hand                      | NR                             | 60    | 6                            | 20 x 1      | 7 | 3 | 21 | No vibration                |

<sup>a</sup>Use of a regional block or anesthesia was allowed. No patient received supplementation of local anesthesia in the area of treatment.

EMS = Electro Medical Systems; HMT = High Medical Technology; EFD = energy flux density; TED = Total energy dose (intensity × number of shocked impulses); NR = not Reported; NA, not application; UE, upper limb.
